# Supplementary material for: Dietary Fatty Acids Alter Lipid Profiles and Induce Myocardial Dysfunction without Causing Metabolic Disorders in Mice
Source: Nutrients. 2018 Jan 19;10(1):106. doi: 10.3390/nu10010106 (PMC5793334; doi:10.3390/nu10010106)
Supplement: Supplementary file 1 [file nutrients-10-00106-s001.zip › Supplementary File 2.pdf]

## Supplementary Tables

**Table S1** Fatty acids composition of experimental diets \*

|                                                   | CHD  | HBD  | HCD  | HMD  | HPD  |
|---------------------------------------------------|------|------|------|------|------|
| <b>Total Fatty Acids, g/kg diet</b>               |      |      |      |      |      |
| Total                                             | 200  | 200  | 200  | 200  | 200  |
| Saturated fat                                     | 178  | 99   | 114  | 121  | 102  |
| Monounsaturated fat                               | 3    | 80   | 67   | 60   | 78   |
| Polyunsaturated fat                               | 19   | 21   | 19   | 20   | 19   |
| <b>Fatty Acid Profile, % of total fatty acids</b> |      |      |      |      |      |
| Saturated fat                                     | 89.1 | 49.5 | 57.0 | 60.4 | 51.3 |
| Monounsaturated fat                               | 1.6  | 40.2 | 33.7 | 29.8 | 39.0 |
| Polyunsaturated fat                               | 9.4  | 10.3 | 9.3  | 9.8  | 9.7  |
| 4:0 (Butyric acid)                                | 0.0  | 0.0  | 0.0  | 3.0  | 0.0  |
| 6:0 (Hexanoic acid)                               | 1.8  | 0.0  | 0.0  | 2.1  | 0.0  |
| 8:0 (Caprylic acid)                               | 60.8 | 0.0  | 0.0  | 1.0  | 0.0  |
| 10:0 (Capric acid)                                | 24.9 | 0.0  | 0.0  | 1.8  | 0.0  |
| 12:0 (Lauric acid)                                | 0.0  | 0.0  | 0.0  | 2.8  | 0.0  |
| 14:0 (Myristic acid)                              | 0.0  | 3.0  | 0.1  | 10.7 | 1.1  |
| 16:0 (Palmitic acid)                              | 0.8  | 24.2 | 24.2 | 24.5 | 45.3 |
| 16:1 (Palmitoleic acid)                           | 0.0  | 3.1  | 0.3  | 1.7  | 0.0  |
| 18:0 (Stearic acid)                               | 0.3  | 19.8 | 31.8 | 11.7 | 4.7  |
| 18:1 (Oleic acid)                                 | 1.6  | 36.3 | 33.4 | 26.9 | 39.0 |
| 18:2 (Linoleic acid)                              | 9.4  | 9.4  | 9.3  | 9.3  | 9.4  |
| 18:3 (Linolenic acid)                             | 0.0  | 0.5  | 0.0  | 0.5  | 0.3  |

CHD, control high fat diet; HBD, high beef tallow diet; HCD, high cocoa butter diet; HMD, high milk fat diet; HPD, high palm oil diet.

\* Data were supplied by Harlan Laboratories.

**Table S2** Body weight and heart weight of mice at 3 and 6 months of feeding regimen.

|                     | <b>CHD</b>   | <b>HBD</b>   | <b>HCD</b>   | <b>HMD</b>    | <b>HPD</b>    |
|---------------------|--------------|--------------|--------------|---------------|---------------|
| <b>3-month diet</b> |              |              |              |               |               |
| BW (g)              | 32.39 ± 2.10 | 31.12 ± 3.02 | 29.99 ± 1.81 | 28.35 ± 5.77  | 38.16 ± 4.46* |
| HW (mg)             | 119.9 ± 7.9  | 122.6 ± 14.0 | 116.6 ± 7.9  | 115.6 ± 17.1  | 138.7 ± 9.5   |
| HW/BW               | 3.72 ± 0.45  | 3.97 ± 0.59  | 3.89 ± 0.24  | 4.18 ± 0.78   | 3.41 ± 0.12   |
| <b>6-month diet</b> |              |              |              |               |               |
| BW (g)              | 35.27 ± 2.53 | 35.81 ± 1.42 | 35.52 ± 4.49 | 42.77 ± 3.75* | 39.66 ± 2.02  |
| HW (mg)             | 139.6 ± 14.7 | 128.4 ± 9.1  | 126.5 ± 20.6 | 152.3 ± 7.7   | 137.0 ± 9.7   |
| HW/BW               | 3.95 ± 0.18  | 3.59 ± 0.23  | 3.56 ± 0.35  | 3.59 ± 0.49   | 3.46 ± 0.29   |

BW, body weight; HW, heart weight; CHD, control high fat diet; HBD, high beef tallow diet; HCD, high cocoa butter diet; HMD, high milk fat diet; HPD, high palm oil diet. Values are mean ± standard deviation, n= 5. \* $P<0.05$  versus CHD.

**Table S3** Metabolic parameters of mice fed high fat diets for 3 months

|                 | <b>CHD</b>   | <b>HBD</b>    | <b>HCD</b>    | <b>HMD</b>    | <b>HPD</b>     |
|-----------------|--------------|---------------|---------------|---------------|----------------|
| SBP (mmHg)      | 96.50 ± 3.66 | 101.77 ± 7.26 | 100.69 ± 2.89 | 103.69 ± 4.86 | 107.43 ± 18.44 |
| DBP (mmHg)      | 70.04 ± 5.02 | 71.45 ± 4.51  | 72.00 ± 3.05  | 75.64 ± 2.87  | 79.23 ± 16.32  |
| Hear rate (bpm) | 710.8 ± 31.8 | 726.8 ± 27.4  | 722.6 ± 37.5  | 688.8 ± 60.9  | 722.3 ± 49.8   |
| FBGL (mmol/L)   | 7.0 ± 1.4    | 7.6 ± 2.7     | 7.1 ± 1.5     | 7.8 ± 2.1     | 5.5 ± 1.1      |

SBP, systolic blood pressure; DBP, diastolic blood pressure; FBGL, fasting blood glucose level; CHD, control high fat diet; HBD, high beef tallow diet; HCD, high cocoa butter diet; HMD, high milk fat diet; HPD, high palm oil diet. Values are mean ± standard deviation, n = 5.

**Table S4** Relevant parameters for cardiac function results from mice fed high fat diets.

|                     | <b>CHD</b>  | <b>HBD</b>   | <b>HCD</b>   | <b>HMD</b>   | <b>HPD</b>   |
|---------------------|-------------|--------------|--------------|--------------|--------------|
| <b>3-month diet</b> |             |              |              |              |              |
| LVPWT (%)           | 41.6 ± 3.3  | 35.1 ± 2.8*  | 34.2 ± 4.3*  | 30.7 ± 3.8*  | 35.6 ± 2.5*  |
| LVIDd (mm)          | 3.61 ± 0.24 | 3.61 ± 0.27  | 3.55 ± 0.39  | 3.67 ± 0.43  | 3.71 ± 0.51  |
| LVIDS (mm)          | 1.81 ± 0.24 | 2.36 ± 0.24* | 2.25 ± 0.33* | 2.39 ± 0.45* | 2.48 ± 0.37* |
| IVRT (msec)         | 15.1 ± 1.1  | 17.1 ± 0.9*  | 17.5 ± 1.0*  | 18.2 ± 0.9*  | 17.2 ± 1.3*  |
| Heart rate (bpm)    | 422 ± 46    | 430 ± 29     | 438 ± 30     | 466 ± 12     | 441 ± 28     |
| <b>6-month diet</b> |             |              |              |              |              |
| LVPWT (%)           | 40.2 ± 2.6  | 31.0 ± 2.1*  | 32.8 ± 2.8*  | 27.6 ± 1.1*  | 33.2 ± 1.9*  |
| LVIDd (mm)          | 3.82 ± 0.22 | 3.84 ± 0.41  | 3.94 ± 0.46  | 4.09 ± 0.51  | 4.02 ± 0.49  |
| LVIDs (mm)          | 1.97 ± 0.10 | 2.69 ± 0.28* | 2.64 ± 0.47* | 2.76 ± 0.33* | 2.80 ± 0.50* |
| IVRT (msec)         | 15.8 ± 1.8  | 19.2 ± 1.8*  | 18.6 ± 1.5   | 19.8 ± 2.0*  | 19.4 ± 1.4*  |
| Heart rate (bpm)    | 468 ± 19    | 469 ± 25     | 445 ± 53     | 457 ± 37     | 457 ± 48     |

LV, Left Ventricular; LVIDd, LV internal dimensions at diastole; LVIDs, LV internal dimensions at systole; LVPWT, LV posterior wall thickening; IVRT, isovolumetric relaxation time. n=5, \**P*<0.05 *versus* CHD.
